---

## Methods

# GeTallele: a mathematical model and a toolbox for integrative analysis and visualization of DNA and RNA allele frequencies

Piotr Słowiński<sup>1,\*</sup>, Muzi Li<sup>2,#</sup>, Paula Restrepo<sup>2</sup>, Nawaf Alomran<sup>2</sup>, Laim Spurr<sup>2</sup>, Christian Miller<sup>2</sup>, Krasimira Tsaneva-Atanasova<sup>1</sup> and Anelia Horvath<sup>2,3,4</sup>

<sup>1</sup>Department of Mathematics, College of Engineering, Mathematics and Physical Sciences, Living Systems Institute and EPSRC Centre for Predictive Modelling in Healthcare, University of Exeter, EX4 4QJ Exeter, UK, <sup>2</sup>McCormick Genomics and Proteomics Center, School of Medicine and Health Sciences, The George Washington University, 20037 Washington, DC, USA, <sup>3</sup>Department of Pharmacology and Physiology, School of Medicine and Health Sciences, The George Washington University, 20037 Washington, DC, USA, <sup>4</sup>Department of Biochemistry and Molecular Medicine, School of Medicine and Health Sciences, The George Washington University, 20037 Washington, DC, USA.

\* To whom correspondence should be addressed.

# Equal contribution

Associate Editor: XXXXXXXX

Received on XXXXX; revised on XXXXX; accepted on XXXXX

## Abstract

**Motivation:** Asymmetric allele expression typically indicates functional and/or structural features associated with the underlying genetic variants. When integrated, RNA and DNA allele frequencies can reveal patterns characteristic for a wide-range of biological traits, including ploidy changes, genome admixture, allele-specific expression and gene-dosage transcriptional response.

**Results:** To assess RNA and DNA allele frequencies from matched sequencing datasets, we introduce GeTallele: a toolpack that provides a suit of functions for integrative analysis, statistical assessment and visualization of **Genome** and **Transcriptome allele** frequencies. We demonstrate this functionality across cancer DNA and RNA sequencing sets by detecting novel relationships between encoded and expressed variation that can improve solving of genome composition and expression regulation. In addition, we explore GeTallele as a tool for preliminary assessment of large-scale genomic alterations from RNA-sequencing datasets.

**Availability:** GeTallele is implemented as a Matlab toolbox available at: <https://git.exeter.ac.uk/pms210/getallele>

**Contact:** P.M.Slowinski@exeter.ac.uk

**Supplementary information:** Supplementary data are available at *Bioinformatics* online.

---

## 1 Introduction

RNA and DNA carry and present the genetic variation in related, yet distinct, manners; the differences being informative of functional and structural traits. In diploid organisms, an important measure of genetic variation is the allele frequency, which can be measured from both genome (DNA) and transcriptome (RNA) sequencing data (encoded and expressed

allele frequency, respectively). Differential DNA-RNA allele frequencies are associated with a variety of biological processes, such as copy number alterations (CNAs), genome admixture, and allele-specific transcriptional regulation (Ferreira, et al., 2016; Ha, et al., 2012; Han, et al., 2015; Movassagh, et al., 2016; Shah, et al., 2012).

Most of the RNA-DNA allele comparisons from sequencing have been approached at nucleotide level, where it proved to be highly informative for determining the alleles' functionality (Ferreira, et al., 2016; Ha, et al.,

2012; Han, et al., 2015; Macaulay, et al., 2016; Morin, et al., 2013; Movassagh, et al., 2016; Reuter, et al., 2016; Shah, et al., 2012; Shi, et al., 2016; Shlien, et al., 2016; The, et al., 2012; Yang, et al., 2016). Comparatively, integration of allele signals at the molecular level, as derived from linear DNA and RNA carriers, is less explored due to challenges presented by short sequencing length and the related within-molecule (gene or chromosome) heterogeneity of the signal. The different molecular nature of RNA and DNA also leads to limited compatibility of the sequencing output. Herein, we address some of these challenges by employing a mathematical model to assess differences between RNA and DNA of allele frequencies along genes and chromosomes.

## 2 Methods

### 2.1 Samples

The GeTallele was developed using sequencing datasets from paired normal and tumour tissue obtained from 72 female patients with breast invasive carcinoma (BRCA) from The Cancer Genome Atlas (TCGA). Each of the 72 datasets contains four matched sequencing datasets: normal exome (Nex), normal transcriptome (Ntr), tumour exome (Tex), and tumour transcriptome (Ttr). In addition, we required each tumour sample to have at least three of the following five purity estimates - Estimate, Absolute, LUMP, IHC, and the consensus purity estimate (CPE), (Supplementary Table 1). Finally, each sample was required to have CNA estimation (genomic segment means based on Genome-Wide-SNPv6 hybridization array) (Aran, et al., 2015; Carter, et al., 2012; Katkovnik, et al., 2002; Pagès, et al., 2010; Yoshihara, et al., 2013; Zheng, et al., 2014).

### 2.2 Data processing

All the datasets were generated through paired-end sequencing on an Illumina HiSeq platform. The human genome reference (hg38)-aligned sequencing reads (Binary Alignment Maps, .bams) were downloaded from the Genomic Data Commons Data Portal (<https://portal.gdc.cancer.gov/>) and processed downstream through an in-house pipeline. After variant call (Li, 2011), the RNA and DNA alignments, together with the variant lists were processed through the read count module of the package RNA2DNAalign (Movassagh, et al., 2016), to produce variant and reference sequencing read counts for all the variant positions in all four sequencing signals (normal exome, normal transcriptome, tumour exome and tumour transcriptome). Selected read count assessments were visually examined using Integrative Genomics Viewer (Thorvaldsdóttir, et al., 2013).

### 2.3 Statistics

To test statistical significance, GeTallele uses non-parametric methods and statistical tests (Corder and Foreman, 2014; Hollander, et al., 2013). Namely, to compare distributions of the VAF values we use Kolmogorov-Smirnov test, to compare medians of the variant probability  $v_{PR}$  values we use Mann-Whitney-Wilcoxon test, and to study concurrence of windows we use permutation/ bootstrap tests. We use Kendall's tau (Kendall, 1938; Kowalski, 1972; Newson, 2002) to analyse correlations between  $v_{PR}$  and admixture purity measures. We use Kendall's tau (Kendall, 1938; Kowalski, 1972; Newson, 2002) to analyse correlations between  $v_{PR}$  and admixture purity measures.

To test relations between  $v_{PR}$  and CNA we use Pearson's correlation coefficients tested against 10000 permutations of the data. We use Pearson's correlation coefficient (rather than Spearman's or Kendall's) because we expect the relation to be linear and we consider the high values of  $v_{PR}$  and CNA to be important and informative for the analysis. We use a permutation test to quantify the statistical significance because the  $v_{PR}$  and CNA values do not have normal distributions, and hence the analytical expression of the significance of the Pearson's correlation is invalid.

To account for multiple comparisons between VAF distributions in the windows we set the probability for rejecting the null hypothesis at  $p < 1e-5$ , which corresponds to Bonferroni (Dunn, 1961) family-wise error rate (FWER) correction against 5000 comparisons. We use a fixed value, rather than other approaches, to ensure better consistency and reproducibility of the results. When appropriate, we also apply Benjamini and Hochberg (Benjamini and Hochberg, 1995) false discovery rates (FDR) correction with a probability of accepting false positive results  $p_{FDR} < 0.1$ .

## 3 Results

GeTallele mathematically and statistically compares RNA and DNA variant allele frequencies ( $VAF_{RNA}$  and  $VAF_{DNA}$ ) at positions of interest, and visualizes the allele distribution at desired resolution from nucleotide to genome (Figure 1). VAFs are estimated from sequencing data and are based on the counts of the variant and reference reads ( $n_{VAR}$  and  $n_{REF}$ ) covering each position of interest in a dataset:  $VAF = n_{VAR} / (n_{VAR} + n_{REF})$ . Analysis of the  $VAF_{RNA}$  and  $VAF_{DNA}$  in the GeTallele is based on comparing probability of observing a given VAF value at various positions of interest. Estimation of the variant allele probability,  $v_{PR}$ , is implemented using a mathematical model of distribution of the VAF values and is the core functionality of the GeTallele (See section 3.1 for details of the model). We demonstrate the GeTallele functionality using matched normal and tumour DNA and RNA sequencing data (i.e. four sequencing signals per sample: normal exome, normal transcriptome, tumour exome and tumour transcriptome); for each sample, the set of variant loci is determined based on the heterozygote calls in the normal exome (Li, et al., 2009).

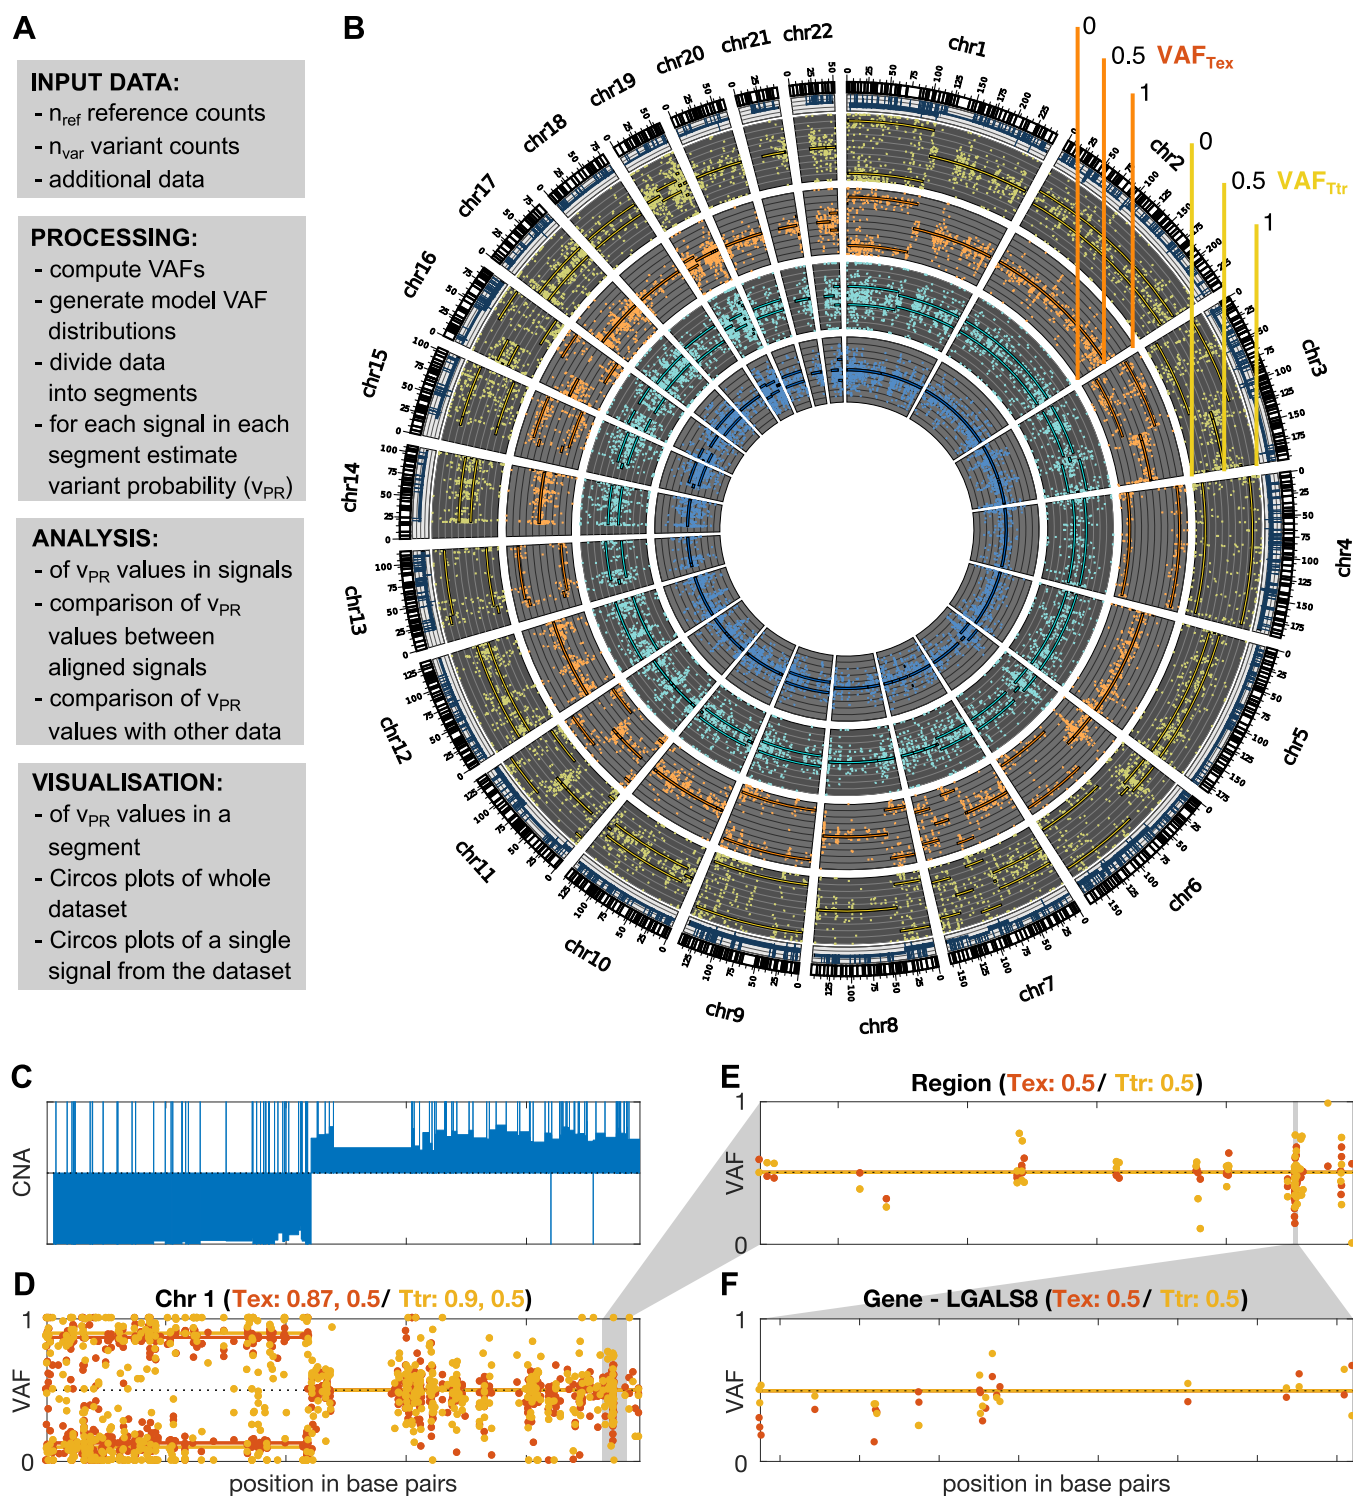

**Fig. 1. GeTallele and visualisation of VAF data.** A Toolbox description. B Visualisation of the whole dataset on the level of genome using Circos plot (blue – normal exome, cyan – normal transcriptome, orange - tumour exome, yellow - tumour transcriptome). C - F show in details VAF<sub>TEX</sub> and VAF<sub>TTR</sub> values of chromosome 1; C - F Visualization of the VAF values with fitted variant probability ( $v_{PR}$  – see Section 3.1 and Figure 2) values at the level of chromosome (D), custom genome region (E) and gene (F), for the chromosome level shown also are CNA values (C). Panel D shows that there are two segments with different VAF distributions. Panel C shows that change in the CNA is concurrent with the change in the VAF distributions. Tex - tumour exome (orange); Ttr - tumour transcriptome (yellow).

### 3.1 Model for estimation of variant probability $v_{pr}$

#### 3.1.1 Data segmentation

To analyse VAF at genome-wide level, GeTallele first divides the VAF dataset into a set of non-overlapping windows along the chromosomes. Segmentation of the dataset into windows is based on a sequencing signal chosen out of all the available datasets in the aggregated aligned VAF dataset (one out of four in the presented analysis). Each window contains all the sequencing signals that are in the analysed dataset.

To partition the data into the windows GeTallele uses a parametric global method, which detects the breakpoints in the signals using its mean, as implemented in the Matlab function `findchangepts` (Killick, et al., 2012; Lavielle, 2005). In each window, the VAF values of the chosen signal have a mean that is different from the mean in the adjacent windows. Sensitivity of breakpoint detection can be controlled using parameter `MinThreshold`, in the presented analysis it was set to 0.2. For segmentation and analysis (without loss of generality) we transform all the original VAF values to  $VAF = |VAF - 0.5| + 0.5$ .

#### 3.1.2 Variant probability

In each window, separately for each sequencing signal, GetAllele estimates variant probability,  $v_{pr}$  - probability of observing a variant allele. The  $v_{pr}$  is a parameter that describes the genomic event that through the sequencing process was transformed into a specific distribution of VAF values found in the signal. For example, in  $VAF_{DNA}$  from a diploid genome, variant probability  $v_{pr}=0.5$  (meaning that both alleles are equally probable) corresponds to a true allelic ratio of 1:1 for heterozygote sites. For heterozygote sites in the normal DNA, the corresponding tumour  $VAF_{DNA}$  is expected to have the following interpretations:  $v_{pr}=1$  or  $v_{pr}=0$  corresponds to a monoallelic status resulting from a deletion, and  $v_{pr}=0.8, 0.75, 0.67$  correspond to allele-specific tetra-, tri-, and duplication of the variant-bearing allele, respectively.

The  $v_{pr}$  of the  $VAF_{RNA}$  is interpreted as follows. In positions corresponding to DNA heterozygote sites, alleles not preferentially targeted by regulatory traits are expected to have expression rates with variant probability  $v_{pr}=0.5$ , which (by default) scale with the DNA allele distribution. Differences between  $VAF_{DNA}$  and  $VAF_{RNA}$  values are observed in special cases of transcriptional regulation where one of the alleles is preferentially transcribed over the other. In the absence of allele-preferential transcription,  $VAF_{DNA}$  and  $VAF_{RNA}$  are anticipated to have similar  $v_{pr}$  across both diploid (normal) and aneuploid (affected by CNAs) genomic regions. Consequently,  $VAF_{DNA}$  and  $VAF_{RNA}$  are expected to synchronously switch between allelic patterns along the chromosomes, with the switches indicating break points of DNA deletions or amplifications.

To estimate  $v_{pr}$  in the signals, GeTallele first generates model VAF distributions and then uses the earth mover's distance (EMD) (Kantorovich and Rubinstein, 1958; Levina and Bickel, 2001) to fit them to the data. To generate a model VAF distribution that correspond to a genomic event with a given variant probability,  $v_{pr}$ , GeTallele, bootstraps 10000 values of the total reads (sum of the variant and reference reads;  $n_{VAR} + n_{REF}$ ) from the analysed signal in dataset. It then uses binomial pseudorandom number generator to get number of successes for given number of total reads and a given value of  $v_{pr}$  (implemented in the Matlab function `binornd`). The  $v_{pr}$  is the probability of success and generated number successes is interpreted as an  $n_{VAR}$ .

Since we observed that DNA and RNA signals have different distributions of total reads, GeTallele generates the model VAF distributions separately for each of the four sequencing signals in the datasets. GeTallele generates the models separately for each dataset because the distributions

of total reads vary between participants. Analysis presented in the paper uses 51 model VAF distributions with  $v_{pr}$  values that vary from 0.5 to 1 with step 0.01. The model VAF distributions are parametrized using only  $v_{pr} \geq 0.5$ , however to generate them we use  $v_{pr}$  and its symmetric counterpart  $1 - v_{pr}$ . Examples of model VAF distributions with different values of  $v_{pr}$  are shown in Figure 2.

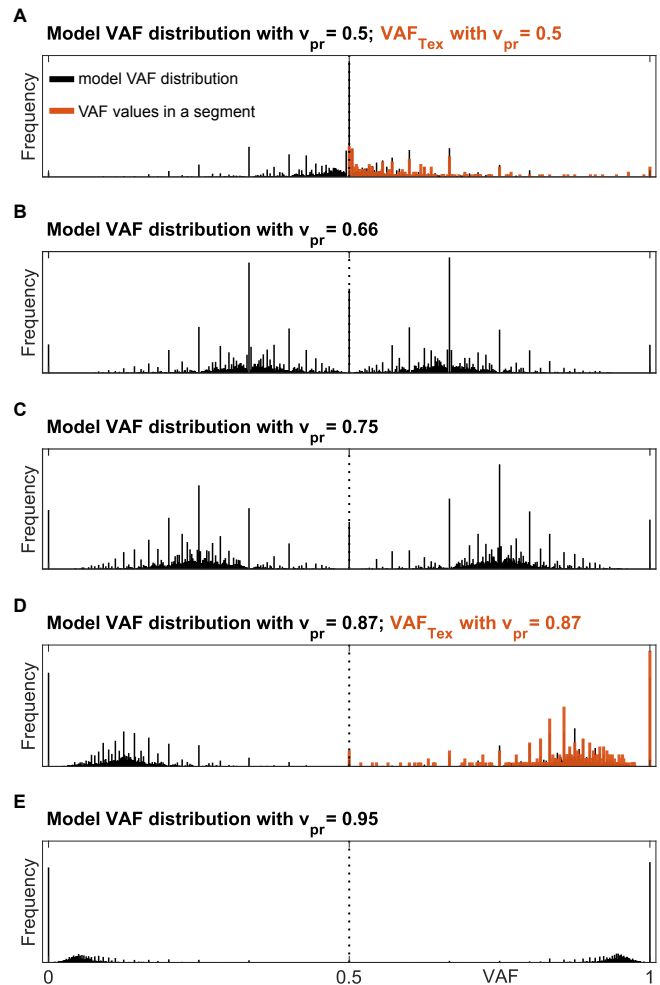

**Fig. 2. Model and real VAF distributions.** A - E Model VAF distributions for different values of  $v_{pr}$ . Panels A and D show additionally distributions of  $VAF_{TEX}$  for the two windows shown in Figure 1D.

#### 3.1.3 Earth mover's distance

EMD is a mathematical metric for quantifying differences between probability distributions (Kantorovich and Rubinstein, 1958; Levina and Bickel, 2001) and for univariate distributions can be computed as

$$EMD(PDF_1, PDF_2) = \int_Z |CDF_1(z) - CDF_2(z)| dz.$$

Here,  $PDF_1$  and  $PDF_2$  are two probability density functions and  $CDF_1$  and  $CDF_2$  are their respective cumulative distribution functions.  $Z$  is the support of the PDFs (i.e. set of all the possible values of the random variables described by them). Because VAFs are defined as simple fractions with values between 0 and 1, their support is given by a Farey sequence (Hardy,

## GeTallele toolbox

et al., 2008) of order  $n$ ;  $n$  is the highest denominator in the sequence. For example Farey sequence of order 2 is 0, 1/2, 1 and Farey sequence of order 3 is 0, 1/3, 1/2, 2/3, 1. GeTallele uses a Farey sequence of order 1000 for all the EMD computations.

To estimate  $v_{PR}$ , GeTallele computes EMD between the distribution of the VAF values of each signal in the window and the 51 model VAF distributions (i.e. observed vs modelled VAF), the estimate is given by the  $v_{PR}$  of the model VAF distribution that is closest to the VAF distribution in the window. Examples of VAF distributions with fitted model VAF distributions are shown in Figure 2A and D. Dependence of the confidence intervals of the estimation on the number of VAF values in a window is presented in Figure 3.

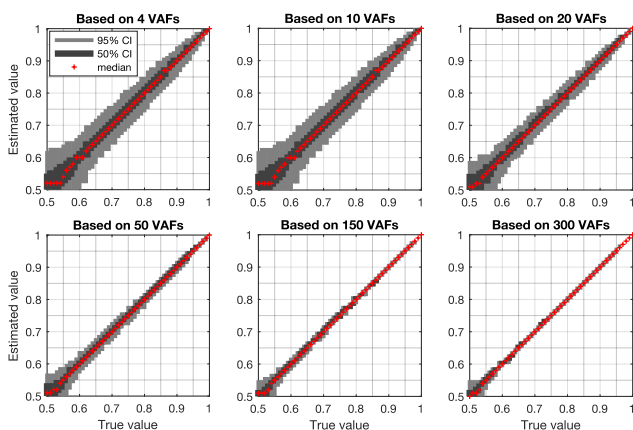

**Fig. 3. Confidence intervals for samples with different numbers of VAFs.** Each confidence interval is based on estimation of  $v_{PR}$  in 1000 randomly generated samples with set  $v_{PR}$  (True value). Light grey bar is 95% confidence interval (950 samples lay within this interval), dark grey bar is 50% confidence interval (500 samples lay within this interval), red cross is median value.

## 3.2 Analysis

GeTallele is readily applicable to assess RNA-DNA relationships between normal and tumour sequencing signals derived from the same sample/individual (matched datasets). As a proof of concept, we assessed matched normal and tumour exome and transcriptome sequencing data of 72 breast carcinoma (BRCA) datasets with pre-assessed copy-number and genome admixture estimation acquired through TCGA (Supplementary Table 1). For these datasets, purity and genome admixture has been assessed using at least three of the following five approaches: ESTIMATE, ABSOLUTE, LUMP, IHC, and the Consensus Purity Estimation (CPE)(Aran, et al., 2015; Carter, et al., 2012; Katkovich, et al., 2002; Pagès, et al., 2010; Yoshihara, et al., 2013; Zheng, et al., 2014). In addition, on the same datasets we applied THetA – a popular tool for assessing CNA and admixture from sequencing data (Oesper, et al., 2013; Oesper, et al., 2014).

### 3.2.1 Segmentation results

Segmentation of the data, based on the tumour exome signal, resulted in 2699 windows across the 72 datasets. We excluded from further analysis 289 windows where either tumour exome or transcriptome had  $v_{PR} \geq 0.58$  but their VAF distribution could not be differentiated from the model VAF distributions with  $v_{PR} = 0.5$  ( $p > 1e-5$ , Kolmogorov Smirnov test, equivalent to Bonferroni FWER correction for 5000 comparisons). The 289 excluded windows correspond to 4% of the data in terms of number of base pairs in

the windows and 4% of all the available data points; i.e. they are short and contain only few VAF values. In the remaining 2410 windows, we systematically examined the similarity between corresponding  $v_{PR,TEX}$  (tumour exome),  $v_{PR,TTR}$  (tumour transcriptome) and CNA. We documented several distinct patterns of coordinated RNA-DNA allelic behaviour as well as correlations with CNA data.

In 65% of all analysed windows the distributions of  $v_{PR,TEX}$  and  $v_{PR,TTR}$  were concordant (had the same  $v_{PR}$  and  $p > 1e-5$ , Kolmogorov Smirnov test), and in 35% they were discordant ( $p < 1e-5$ , Kolmogorov Smirnov test). In 1% of all windows  $v_{PR,TEX}$  and  $v_{PR,TTR}$  had the same  $v_{PR}$  but had statistically different distributions ( $p < 1e-5$ , Kolmogorov Smirnov test), we consider such windows as concordant; Kolmogorov-Smirnov test is very sensitive for differences between distributions,  $v_{PR}$  fitting is more robust. In the vast majority of the discordant windows  $v_{PR}$  of the  $v_{PR,TTR}$ ,  $v_{PR,TTR}$ , was higher than  $v_{PR}$  of the  $v_{PR,TEX}$ ,  $v_{PR,TEX}$ , (only in 21 out of 944 windows  $v_{PR,TTR}$  was lower than  $v_{PR,TEX}$ ).

### 3.2.2 Correlation with purity

In windows with discordant  $v_{PR,TEX}$  and  $v_{PR,TTR}$  distributions, we observed significant negative correlation between the difference ( $v_{PR,TTR} - v_{PR,TEX}$ ) and the samples' purity estimates (ESTIMATE:  $\tau = -0.16$ ,  $p = 0.0005$ ; ABSOLUTE:  $\tau = -0.33$ ,  $p = 1.2e-13$ ; LUMP:  $\tau = -0.6$ ,  $p = 9.3e-29$ ; IHC:  $\tau = -0.13$ ,  $p = 0.003$ ; CPE:  $\tau = -0.3$ ,  $p = 5.5e-11$ , Kendall's tau; see also Figure 4).

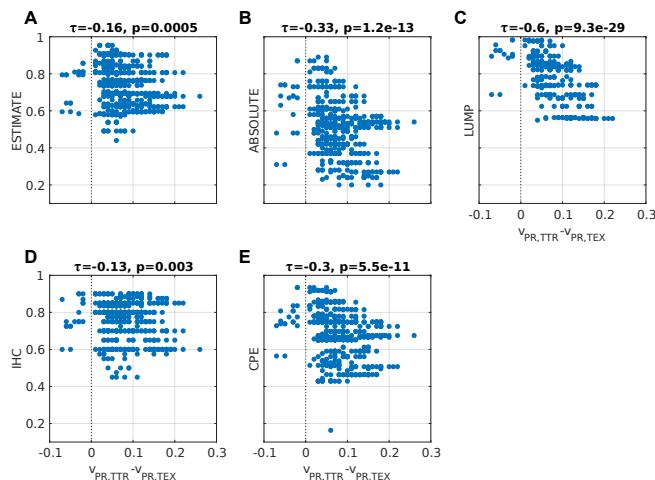

**Fig. 4. Illustration of correlations between estimates of sample purity and  $v_{PR,TTR} - v_{PR,TEX}$  in windows where  $v_{PR,TEX}$  and  $v_{PR,TTR}$  are statistically discordant ( $p < 1e-5$ , Kolmogorov Smirnov test).**

### 3.2.3 Concurrence of segmentation based on DNA and RNA

We next analysed the concurrence between windows resulting from independent segmentations of the dataset based on the tumour exome and transcriptome signals in the datasets (2699 and 3603 windows, respectively, across all the samples). We first assessed chromosome-wise alignment of the start and end points of the windows. In 45% of the chromosomes both  $v_{PR,TEX}$  and  $v_{PR,TTR}$  signals produce a single window that contains the whole chromosome. In 33% of chromosomes both signals produced multiple windows. These windows are well aligned, with 90% of the break points within 7% difference in terms of number of data points in the chromosome (Q50=0.02%, Q75=2% of data points in the chromosome). Probability of observing such an alignment by chance is smaller than  $p = 1e-5$

(100,000 bootstrap samples with breaking points assigned randomly in all the individual chromosomes where both signals produced multiple windows). In 22% of the chromosome windows based on  $VAF_{TEX}$  and  $VAF_{TTR}$  signals were positionally discordant – one signal produced a single window containing whole chromosome while the other produced multiple windows.

To compare the  $v_{PR}$  values in the 55% of chromosomes where at least one signal produced single window, we computed chromosome-wise mean absolute error (MEA) between the  $v_{PR}$  in two sets of windows. To account for different start and end points of the windows we interpolated the  $v_{PR}$  values (nearest neighbour interpolation) at each data point in the chromosome. We separately compared the  $v_{PR,TEX}$  and  $v_{PR,TTR}$  values. The alignment in terms of MEA is very good,  $v_{PR,TEX}$  agreed perfectly in 8% of the chromosomes and had the percentiles of MEA equal to  $Q50=0.013$ ,  $Q75=0.02$  and  $Q97.5=0.05$ , while  $v_{PR,TTR}$  also agreed perfectly in 8% but had slightly higher percentiles of MEA  $Q50=0.02$ ,  $Q75=0.033$  and  $Q97.5=0.068$ .  $v_{PR,TEX}$  and  $v_{PR,TTR}$  values had  $MEA=0$  simultaneously in 4% of the chromosomes. Probability of observing such values of MEA by chance is smaller than  $p=1e-3$  (1000 random assignments of  $v_{PR,TEX}$  and  $v_{PR,TTR}$  values to windows in the 873 chromosomes where at least one signal had more than one window). It is noteworthy that  $MEA_{Q97.5} < 0.07$  is comparable with the confidence interval of single  $v_{PR}$  estimate; compare Figure 3. In other words, both signals in a sample (Tex and Ttr) give very similar results in terms of windows' segmentation and estimated values of the  $v_{PR}$ . Albeit, segmentation of  $VAF_{TTR}$  generates higher number of windows. Figure 5 shows examples of concurrence between windows based on  $VAF_{TEX}$  and  $VAF_{TTR}$  signals in a positionally concordant chromosome (both signals produced multiple windows).

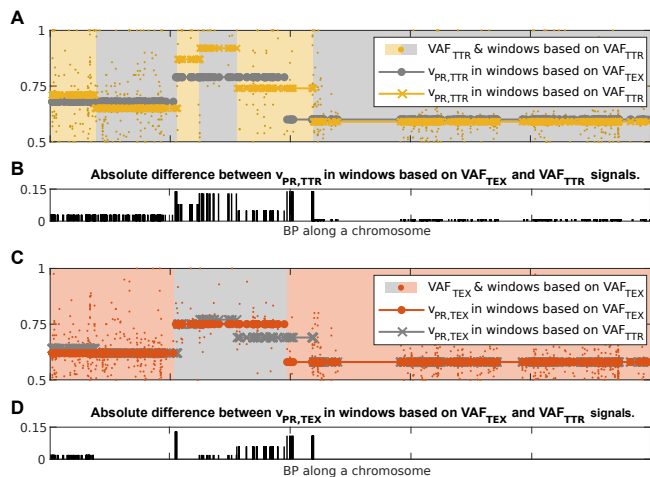

**Fig. 5. Illustration of concurrence between windows resulting from independent segmentations of the dataset based on the  $VAF_{TEX}$  and  $VAF_{TTR}$  signals.** A yellow dots,  $VAF_{TTR}$ ; grey circles,  $v_{PR,TTR}$  interpolated at all data points in windows based on  $VAF_{TEX}$ ; yellow crosses,  $v_{PR,TTR}$  interpolated at all data points in windows based on  $VAF_{TTR}$ . B bar plot of the absolute difference between the  $v_{PR}$  values in the two kinds of windows. C orange dots,  $VAF_{TEX}$ ; grey crosses,  $v_{PR,TEX}$  interpolated at all data points in windows based on  $VAF_{TEX}$ ; orange dots  $v_{PR,TEX}$  interpolated at all data points in windows based on  $VAF_{TTR}$ . D bar plot of the absolute difference between the  $v_{PR}$  values in the two kinds of windows.

### 3.2.4 Correlation between $v_{PR}$ and CNA

Finally, we analysed the correlations between  $v_{PR}$  and CNA in the individual datasets. We separately computed correlations for deletions and amplifications. In order to separate deletions and amplifications, for each data set we found  $CNA_{MIN}$ , value of the CNA in the range  $-0.25$  to  $0.25$  that had the smallest corresponding  $v_{PR,TEX}$ . To account for observed variability of the CNA values near the  $CNA_{MIN}$ , we set the threshold for amplifications to  $CNA_A = CNA_{MIN} - 0.05$ , and for deletions we set it to  $CNA_D = CNA_{MIN} + 0.05$ . For  $VAF_{TEX}$  we observed significant correlations with negative trend between  $v_{PR,TEX}$  and  $CNA \leq CNA_D$  in 58 datasets and with positive trend between  $v_{PR,TEX}$  and  $CNA \geq CNA_A$  in 39 datasets ( $p_{FDR} < 0.05$ , Pearson's correlation with Benjamini Hochberg FDR correction). For  $VAF_{TTR}$  we observed significant correlations with negative trend between  $v_{PR,TTR}$  and  $CNA \leq CNA_D$  in 65 datasets and with positive trend between  $v_{PR,TTR}$  and  $CNA \geq CNA_A$  in 32 datasets ( $p_{FDR} < 0.05$ , Pearson correlation with Benjamini Hochberg correction). Such strong correlations indicate that  $v_{PR}$  accurately captures information contained in CNA. Although, it does not differentiate between positive and negative values of the CNA.

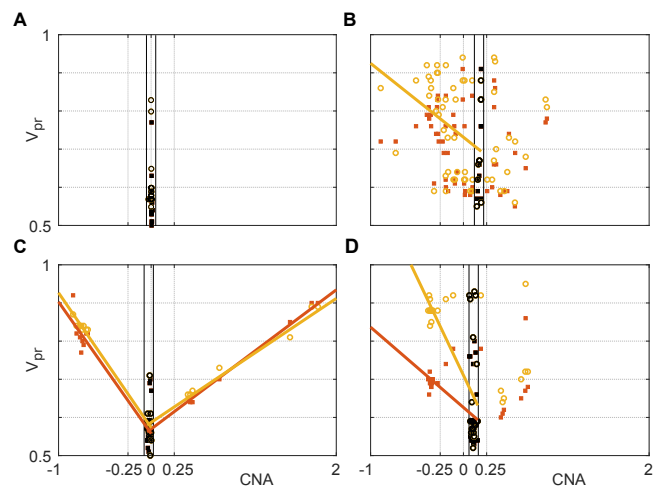

**Fig. 6. Illustration of the correlations between  $v_{PR}$  and CNA.** Orange squares  $v_{PR,TEX}$ , yellow circles  $v_{PR,TTR}$ . Lines, least-squares fitted trends for significant correlations (orange correlation with  $v_{PR,TEX}$ , yellow correlation with  $v_{PR,TTR}$ ). Black,  $v_{PR}$  for  $CNA_{MIN}=0.05$ . Correlations for all the datasets are shown in Supplementary Figure 1. A there are no significant correlations, all the values of CNA are close to  $CNA_{MIN}$ . B relationship between CNA and  $v_{PR}$  is noisy, only some correlations are statistically significant. C all the correlations are statistically significant,  $v_{PR,TTR}$  values (circles) follow closely the  $v_{PR,TEX}$  (squares) indicating concordance of the  $VAF_{TEX}$  and  $VAF_{TTR}$  distributions. D only correlations for  $CNA \leq CNA_D$  are statistically significant.

Figure 6 shows four typical patterns of correlation between the CNA and  $v_{PR}$  values observed in the data. In Figure 6A there are no significant correlations, all the values of CNA are close to  $CNA_{MIN}$ . In Figure 6B relationship between CNA and  $v_{PR}$  is noisy, only correlation between  $v_{PR,TTR}$  and  $CNA \leq CNA_D$  are statistically significant. In Figure 6C all the correlations are statistically significant,  $v_{PR,TTR}$  values (circles) follow closely the  $v_{PR,TEX}$  (squares) indicating that in most of the windows distributions of the  $VAF_{TEX}$  and  $VAF_{TTR}$  are concordant. In Figure 6D correlations between  $v_{PR,TEX}$ ,  $v_{PR,TTR}$  and  $CNA \leq CNA_D$  are statistically significant, but there is big difference (with median of 0.18) between  $v_{PR,TEX}$  and  $v_{PR,TTR}$  values, indicating that in most of the windows the distributions of the  $VAF_{TEX}$  and  $VAF_{TTR}$  in this dataset are discordant. Visual inspection of the data reveals that for many datasets the correlations are visible, but

## GeTallele toolbox

they do not reach statistical significance due to small number of points or strong outliers. This further, indicates that  $v_{PR}$  and CNA measures are concordant in terms of information that they contain.

## 4 Discussion

Integrative analysis of RNA and DNA sequence data is facilitated by the growing availability of RNA and DNA sequencing datasets and by the technological advances now enabling simultaneous RNA and DNA sequencing from the same source (Macaulay, et al., 2016; Reuter, et al., 2016; The, et al., 2012). However, RNA and DNA integrative analyses are challenged by limited compatibility between RNA and DNA datasets and high technical variance of the sequencing-produced signals. Our approach – GeTallele – addresses the compatibility restricting the analyses within confidently co-covered DNA and RNA regions, and the high variability - through computing the distance between the two distributions.

Using GeTallele, we detected several intriguing relationships between DNA-RNA allele frequencies and biological processes. First, in chromosomes affected by deletions and amplifications,  $VAF_{RNA}$  and  $VAF_{DNA}$  showed highly concordant break point calls. This indicates that  $VAF_{RNA}$  alone can serve as preliminary indicator for deletions and amplifications, which can facilitate the applications of RNA-sequencing analysis on the large and constantly growing collections of transcriptome sequencing data. Second, higher difference between  $VAF_{TTR}$  and  $VAF_{TEX}$  distributions ( $v_{PR,TTR} - v_{PR,TEX}$ ), indicative for higher level of allele-specific expression, correlated with low sample purity (see Figure 4). Biologically, this observation likely implicates higher level of imprinting (transcription from one of the DNA alleles) in samples with low genome integrity, which is generally aligned with the increased number of CNAs and the fast replication cycle in advances tumour samples.

Based on our results, variant probability  $v_{PR}$  can serve as a dependable indicator to assess gene and chromosomal allele asymmetries and to aid calls of genomic events. Importantly, GeTallele allows to visualize the observed patterns, with the ability to magnify regions of interest to desired resolution, including chromosome, gene, or custom genome region, along with statistical measures of the modes, for all the modes in the examined segment.

## Acknowledgements

## Funding

This work was supported by McCormick Genomic and Proteomic Center (MGPC), The George Washington University; [MGPC\_PG2018 to A.H.]. Work of P.S. was generously supported by the Wellcome Trust Institutional Strategic Support Award [204909/Z/16/Z].

*Conflict of Interest:* none declared.

## References

Aran, D., Sirota, M. and Butte, A.J. Systematic pan-cancer analysis of tumour purity. *Nature communications* 2015;6:8971.  
Benjamini, Y. and Hochberg, Y. Controlling the False Discovery Rate - a Practical and Powerful Approach to Multiple Testing. *J Roy Stat Soc B Met* 1995;57(1):289-300.  
Carter, S.L., et al. Absolute quantification of somatic DNA alterations in human cancer. *Nature biotechnology* 2012;30(5):413-421.  
Corder, G.W. and Foreman, D.I. *Nonparametric Statistics*. John Wiley & Sons; 2014.  
Dunn, O.J. Multiple Comparisons among Means. *J Am Stat Assoc* 1961;56(293):52-64.

Ferreira, E., Shaw, D.M. and Oddo, S. Identification of learning-induced changes in protein networks in the hippocampi of a mouse model of Alzheimer's disease. *Translational psychiatry* 2016;6(7):e849.  
Ha, G., et al. Integrative analysis of genome-wide loss of heterozygosity and mono-allelic expression at nucleotide resolution reveals disrupted pathways in triple-negative breast cancer. *Genome research* 2012;22(10):1995-2007.  
Han, L., et al. Alternative applications for distinct RNA sequencing strategies. *Briefings in bioinformatics* 2015;16(4):629-639.  
Hardy, G.H., et al. *An introduction to the theory of numbers*. Oxford ; New York: Oxford University Press; 2008.  
Hollander, M., Wolfe, D.A. and Chicken, E. *Nonparametric Statistical Methods*. John Wiley & Sons; 2013.  
Kantorovich, L.V. and Rubinstein, G.S. On a space of completely additive functions. *Vestnik Leningrad. Univ* 1958;13(7):52-59.  
Katkovnik, V., Kgiazarian, K. and Astola, J. Adaptive window size image de-noising based on intersection of confidence intervals (ICI) rule. *J Math Imaging Vis* 2002;16(3):223-235.  
Kendall, M.G. A new measure of rank correlation. *Biometrika* 1938;30(1-2):81-93.  
Killick, R., Fearnhead, P. and Eckley, I.A. Optimal Detection of Changepoints With a Linear Computational Cost. *J Am Stat Assoc* 2012;107(500):1590-1598.  
Kowalski, C.J. On the Effects of Non-Normality on the Distribution of the Sample Product-Moment Correlation Coefficient. *Journal of the Royal Statistical Society. Series C (Applied Statistics)* 1972;21(1):1-12.  
Lavielle, M. Using penalized contrasts for the change-point problem. *Signal Process* 2005;85(8):1501-1510.  
Levina, E. and Bickel, P. The Earth Mover's distance is the Mallows distance: some insights from statistics. In, *IEEE International Conference on Computer Vision* 2001. p. 251-256.  
Li, H. A statistical framework for SNP calling, mutation discovery, association mapping and population genetical parameter estimation from sequencing data. *Bioinformatics* 2011;27(21):2987-2993.  
Li, H., et al. The Sequence Alignment/Map format and SAMtools. *Bioinformatics* 2009;25(16):2078-2079.  
Macaulay, I.C., et al. Separation and parallel sequencing of the genomes and transcriptomes of single cells using G&T-seq. *Nature protocols* 2016;11(11):2081-2103.  
Morin, R.D., et al. Mutational and structural analysis of diffuse large B-cell lymphoma using whole-genome sequencing. *Blood* 2013;122(7):1256-1265.  
Movassagh, M., et al. RNA2DNAalign: nucleotide resolution allele asymmetries through quantitative assessment of RNA and DNA paired sequencing data. *Nucleic acids research* 2016;44(22):e161.  
Newson, R. Parameters behind "nonparametric" statistics: Kendall's tau, Somers' D and median differences. *Stata Journal* 2002;2(1):45-64.  
Oesper, L., Mahmoody, A. and Raphael, B.J. THetA: inferring intra-tumor heterogeneity from high-throughput DNA sequencing data. *Genome biology* 2013;14(7):R80.  
Oesper, L., Satas, G. and Raphael, B.J. Quantifying tumor heterogeneity in whole-genome and whole-exome sequencing data. *Bioinformatics (Oxford, England)* 2014;30(24):3532-3540.  
Pagès, F., et al. Immune infiltration in human tumors: a prognostic factor that should not be ignored. *Oncogene* 2010;29(8):1093-1102.  
Reuter, J.A., et al. Simul-seq: combined DNA and RNA sequencing for whole-genome and transcriptome profiling. *Nature methods* 2016;13(11):953-958.  
Shah, S.P., et al. The clonal and mutational evolution spectrum of primary triple-negative breast cancers. *Nature* 2012;486(7403):395-399.  
Shi, L., et al. Long-read sequencing and de novo assembly of a Chinese genome. *Nature communications* 2016;7:12065.  
Shlien, A., et al. Direct Transcriptional Consequences of Somatic Mutation in Breast Cancer. *Cell reports* 2016;16(7):2032-2046.  
The, E.P.C., et al. An integrated encyclopedia of DNA elements in the human genome. *Nature* 2012;489:57.  
Thorvaldsdóttir, H., Robinson, J.T. and Mesirov, J.P. Integrative Genomics Viewer (IGV): high-performance genomics data visualization and exploration. *Briefings in bioinformatics* 2013;14(2):178-192.  
Yang, S., et al. An Integrated Approach for RNA-seq Data Normalization. *Cancer informatics* 2016;15:129-141.  
Yoshihara, K., et al. Inferring tumour purity and stromal and immune cell admixture from expression data. *Nature communications* 2013;4:2612.  
Zheng, X., et al. MethylPurify: tumor purity deconvolution and differential methylation detection from single tumor DNA methylomes. *Genome biology* 2014;15(8):419.

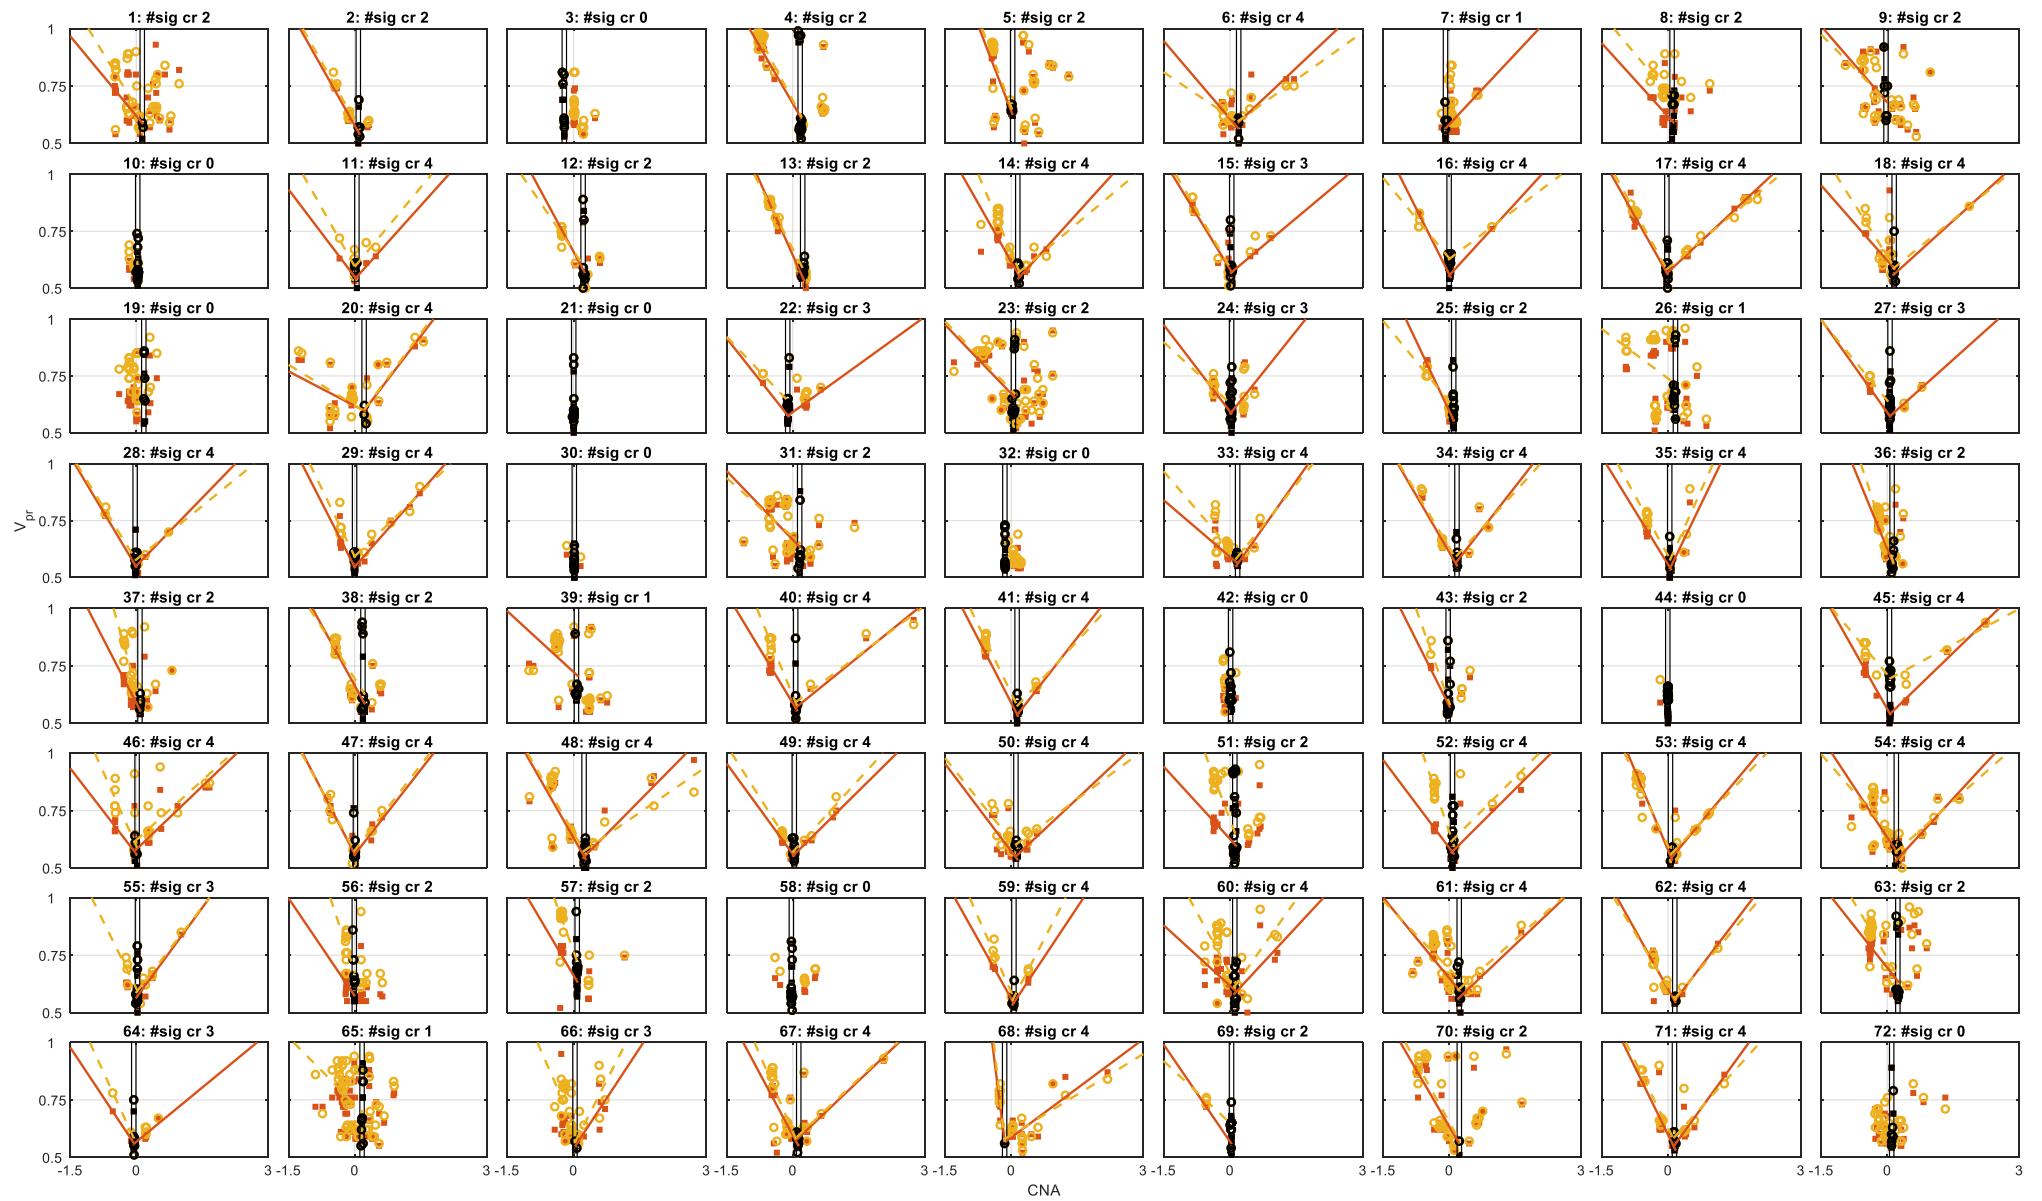

**Supplementary Fig. 1. Illustration of the correlations between  $v_{pr}$  and CNA.** Orange squares  $v_{PR,TEX}$ , yellow circles  $v_{PR,TTR}$ . Lines, least-squares fitted trends for significant correlations (orange correlation with  $v_{PR,TEX}$ , yellow correlation with  $v_{PR,TTR}$ ). Black,  $v_{PR}$  for  $CNA_{MIN} \neq 0.05$ . Title format Number of the dataset: #sig cr number of significant correlations in the dataset.



**Supplementary Table 1.** Datasets, signals and purity estimates.

| #  | TCGA BRCA datasets                                                                                                                                                                                                                                                                   | EST    | ABS  | LUMP   | IHC   | CPE    |
|----|--------------------------------------------------------------------------------------------------------------------------------------------------------------------------------------------------------------------------------------------------------------------------------------|--------|------|--------|-------|--------|
| 1  | 001_Nex_BRCA_TCGA-BH-A1FC-11A_413b80f6-f6cf-4992-804a-f045e38cbe6f<br>001_Ntr_BRCA_TCGA-BH-A1FC-11A_086db136-f3f2-42fa-aca1-63847de6ccb9<br>001_Tex_BRCA_TCGA-BH-A1FC-01A_1a2187a6-aea8-4096-8c3f-208a8467cd5a<br>001_Ttr_BRCA_TCGA-BH-A1FC-01A_b5e2f568-e6fc-4192-a3ab-da956e5bfa4c | 0.7615 | 0.49 | 0.6693 | 0.9   | 0.6517 |
| 2  | 002_Nex_BRCA_TCGA-BH-A0B5-11A_c724807c-d80d-4582-8238-8339397b6aac<br>002_Ntr_BRCA_TCGA-BH-A0B5-11A_f478930d-216a-40ec-b434-bfc3a7b2f62b<br>002_Tex_BRCA_TCGA-BH-A0B5-01A_803de3d6-895f-4ad1-a86c-6f72d6ea8430<br>002_Ttr_BRCA_TCGA-BH-A0B5-01A_37175dfe-e34e-4f97-88b1-c0ba4bd5d093 | 0.7539 | 0.5  | 0.8944 | 0.575 | 0.6566 |
| 3  | 003_Nex_BRCA_TCGA-BH-A0BJ-11A_a9988fbb-090a-4363-bf73-7505e1710623<br>003_Ntr_BRCA_TCGA-BH-A0BJ-11A_2ced85bc-852a-4056-ad11-2e88ec6d2d82<br>003_Tex_BRCA_TCGA-BH-A0BJ-01A_58ec1111-c932-49ea-9327-1c64dfc2afa6<br>003_Ttr_BRCA_TCGA-BH-A0BJ-01A_73442f2d-3453-42ee-b57a-86871e2e2fd9 | 0.7386 | 0.37 | 0.8453 | 0.7   | 0.7458 |
| 4  | 004_Nex_BRCA_TCGA-E2-A158-11A_58fe3067-8198-486e-b0b2-286dc4451c39<br>004_Ntr_BRCA_TCGA-E2-A158-11A_323eb80d-71e2-4223-b471-a83ee42e6e08<br>004_Tex_BRCA_TCGA-E2-A158-01A_0329fa7e-d768-4bbe-940e-36f0b9829d7c<br>004_Ttr_BRCA_TCGA-E2-A158-01A_9d31f395-85e7-4ad8-95a3-0cc796c4b81d | 0.9534 | NaN  | NaN    | 0.8   | 0.7799 |
| 5  | 005_Nex_BRCA_TCGA-A7-A13E-11A_bd7e6f8f-7213-4ded-a8ca-3c73c7b8d918<br>005_Ntr_BRCA_TCGA-A7-A13E-11A_99c08ce4-6526-4982-9bc7-b9c07972bcd5<br>005_Tex_BRCA_TCGA-A7-A13E-01A_28b8b84b-ca69-4c6a-860c-989777b18d32<br>005_Ttr_BRCA_TCGA-A7-A13E-01A_148d5aec-6026-46b5-b40c-38a1198175ab | 0.909  | 0.83 | 0.9772 | 0.85  | 0.9184 |
| 6  | 006_Nex_BRCA_TCGA-BH-A208-11A_645b786f-1942-4cce-973b-4a75956265f5<br>006_Ntr_BRCA_TCGA-BH-A208-11A_a6dd96f4-f194-4c8d-8757-9e8b35465a9f<br>006_Tex_BRCA_TCGA-BH-A208-01A_5bdbd7db-ced4-4446-9069-c44c9c1f0ae0<br>006_Ttr_BRCA_TCGA-BH-A208-01A_794bcf95-8e66-4f91-a49c-ab10defe73c5 | 0.5951 | 0.31 | 0.6877 | 0.6   | 0.5642 |
| 7  | 007_Nex_BRCA_TCGA-BH-A1FU-11A_db7e821b-a2b6-40e1-9fbc-c72231b703a4<br>007_Ntr_BRCA_TCGA-BH-A1FU-11A_c051b92b-8e11-4623-b11b-3a0d52710663<br>007_Tex_BRCA_TCGA-BH-A1FU-01A_cb37bb7f-8fb6-432a-a58a-f8178d5baa64<br>007_Ttr_BRCA_TCGA-BH-A1FU-01A_7ea95c3a-b1a6-4658-b4c2-f35f3f48394e | 0.6835 | 0.25 | 0.667  | 0.6   | 0.6121 |
| 8  | 008_Nex_BRCA_TCGA-BH-A0AY-11A_2ecc0325-3973-48b3-b53b-bb52aea5a9bc<br>008_Ntr_BRCA_TCGA-BH-A0AY-11A_1b2877ac-94a0-464c-b58b-9ce2f16aff37<br>008_Tex_BRCA_TCGA-BH-A0AY-01A_357ccb95-03e5-49f6-ab18-38d4c8d4d820<br>008_Ttr_BRCA_TCGA-BH-A0AY-01A_a19a60e7-e5ca-4f66-96fe-c9add702177d | 0.6376 | 0.42 | NaN    | 0.7   | 0.5612 |
| 9  | 009_Nex_BRCA_TCGA-BH-A18U-11A_bf3d62cb-f3a6-45d6-b9c3-416e58f1d319<br>009_Ntr_BRCA_TCGA-BH-A18U-11A_9d4c1d7e-dd77-41d1-b1df-144e7afb2141<br>009_Tex_BRCA_TCGA-BH-A18U-01A_a80933e5-3b07-41dc-b7f0-499d63c071a9<br>009_Ttr_BRCA_TCGA-BH-A18U-01A_ff89e0d9-7e6c-4b6b-a1c3-f80aaa414a1  | 0.7949 | 0.68 | NaN    | 0.75  | 0.8077 |
| 10 | 010_Nex_BRCA_TCGA-AC-A2FF-11A_714e11fb-be71-4bbd-9327-457883a07ef0<br>010_Ntr_BRCA_TCGA-AC-A2FF-11A_4d32c4fa-959e-41cf-b837-104290bab9fa<br>010_Tex_BRCA_TCGA-AC-A2FF-01A_5c6fe1fc-839c-422a-89e7-4a54dcfad6c2<br>010_Ttr_BRCA_TCGA-AC-A2FF-01A_37bf962c-b180-4cc2-8e0b-fde78b4f99f4 | 0.5705 | NaN  | 0.6868 | 0.8   | 0.6667 |
| 11 | 011_Nex_BRCA_TCGA-BH-A0BQ-11A_a5bdd116-8c1b-4787-be01-4c0f96709cc5<br>011_Ntr_BRCA_TCGA-BH-A0BQ-11A_45e17d22-fbed-418b-97fc-7104e1deec1<br>011_Tex_BRCA_TCGA-BH-A0BQ-01A_27138381-1865-4a6a-bd70-58725c92cb49<br>011_Ttr_BRCA_TCGA-BH-A0BQ-01A_8879454d-b803-40b6-b3d7-fbc295de9df6  | 0.6814 | 0.4  | NaN    | 0.5   | 0.5779 |
| 12 | 012_Nex_BRCA_TCGA-BH-A0BA-11A_9dbc7f19-30bd-48fd-8d5a-ca67dc26c5b1<br>012_Ntr_BRCA_TCGA-BH-A0BA-11A_2cc17895-0a6e-4703-8164-7034f5c2e1a8<br>012_Tex_BRCA_TCGA-BH-A0BA-01A_b4c0df66-54c1-4bbf-9a3c-d2fd28d5bb4b<br>012_Ttr_BRCA_TCGA-BH-A0BA-01A_a9f9701c-6b4b-48ed-af83-94804fb098a8 | 0.7944 | 0.48 | 0.8945 | 0.87  | 0.7278 |
| 13 | 013_Nex_BRCA_TCGA-BH-A0B8-11A_ef67ace2-01d6-4e8b-92c7-7c4e1e5ca327<br>013_Ntr_BRCA_TCGA-BH-A0B8-11A_3a833d6d-75c7-4381-8cef-699c633b64e6<br>013_Tex_BRCA_TCGA-BH-A0B8-01A_54972439-f9da-497d-a605-24e9670021ad<br>013_Ttr_BRCA_TCGA-BH-A0B8-01A_9c7776d0-33df-4bd7-a720-807c650fdbc5 | 0.8571 | 0.87 | 0.9827 | 0.85  | 0.9342 |
| 14 | 014_Nex_BRCA_TCGA-BH-A0AU-11A_15483d36-ad24-4771-a991-8a8435effc6a<br>014_Ntr_BRCA_TCGA-BH-A0AU-11A_7f667d91-04aa-48e8-b675-9d99b64b2058<br>014_Tex_BRCA_TCGA-BH-A0AU-01A_e7a641f3-cc31-4319-a04b-75c42e991711<br>014_Ttr_BRCA_TCGA-BH-A0AU-01A_23e09239-bfc3-4c2e-b690-db940d5292f7 | 0.765  | 0.46 | 0.8525 | 0.775 | 0.652  |
| 15 | 015_Nex_BRCA_TCGA-BH-A18S-11A_9e6d6a2d-ce9e-4d44-9603-f843ffa06c63<br>015_Ntr_BRCA_TCGA-BH-A18S-11A_b54a0f88-21be-4c6d-a27a-1c1b8959652c<br>015_Tex_BRCA_TCGA-BH-A18S-01A_d4746397-9268-460a-954b-e5b5921138f9<br>015_Ttr_BRCA_TCGA-BH-A18S-01A_e0a3ea3a-ffce-4e30-9f42-cb047a7644a1 | 0.8948 | 0.89 | NaN    | 0.85  | 0.8676 |

|    |                                                                    |        |      |        |       |        |
|----|--------------------------------------------------------------------|--------|------|--------|-------|--------|
| 16 | 016_Nex_BRCA_TCGA-BH-A0HK-11A_d256dce0-d74b-4f8f-bf47-40b1b953fc7f | 0.7649 | 0.78 | 0.9163 | 0.925 | 0.8357 |
|    | 016_Ntr_BRCA_TCGA-BH-A0HK-11A_438650e8-0ee2-4c74-8432-88b5c8006187 |        |      |        |       |        |
|    | 016_Tex_BRCA_TCGA-BH-A0HK-01A_944b4c29-bf72-4eec-b277-badc237730de |        |      |        |       |        |
|    | 016_Ttr_BRCA_TCGA-BH-A0HK-01A_fe04f368-0a73-4f97-9d6b-2986f9b2b052 |        |      |        |       |        |
| 17 | 017_Nex_BRCA_TCGA-A7-A0D9-11A_dda70534-0d4d-4c30-9c6a-fb3c39396fb0 | 0.8911 | 0.8  | 1      | 0.775 | 0.8921 |
|    | 017_Ntr_BRCA_TCGA-A7-A0D9-11A_17cf6364-e228-4ee9-bffa-d1ad75f4152b |        |      |        |       |        |
|    | 017_Tex_BRCA_TCGA-A7-A0D9-01A_821d7a33-77fb-496e-be9c-0552b12cbbec |        |      |        |       |        |
|    | 017_Ttr_BRCA_TCGA-A7-A0D9-01A_c0ecd314-9d99-48ec-83f1-5a0c1ed656aa |        |      |        |       |        |
| 18 | 018_Nex_BRCA_TCGA-BH-A0BV-11A_56dfc492-2b1f-4494-9ba9-14a70601ae21 | 0.6895 | 0.54 | NaN    | 0.725 | 0.6749 |
|    | 018_Ntr_BRCA_TCGA-BH-A0BV-11A_20459115-d7be-4d04-896f-c5ff6923ec4c |        |      |        |       |        |
|    | 018_Tex_BRCA_TCGA-BH-A0BV-01A_beb9e4cf-1f76-4a26-acee-e88d0936e60b |        |      |        |       |        |
|    | 018_Ttr_BRCA_TCGA-BH-A0BV-01A_d037d3c2-e316-473d-9970-d4fb43615d95 |        |      |        |       |        |
| 19 | 019_Nex_BRCA_TCGA-E2-A1LH-11A_61558dd3-8f6c-4f70-8717-7676580fa5a7 | 0.5948 | 0.32 | 0.5637 | 0.8   | 0.4633 |
|    | 019_Ntr_BRCA_TCGA-E2-A1LH-11A_c7e02b93-465f-47da-81d7-ec9a8cb1e52b |        |      |        |       |        |
|    | 019_Tex_BRCA_TCGA-E2-A1LH-01A_f54770bb-5dd0-48cf-ac5a-3f023a6aef95 |        |      |        |       |        |
|    | 019_Ttr_BRCA_TCGA-E2-A1LH-01A_169c390c-a211-4db0-a983-9bf5d6ee16e  |        |      |        |       |        |
| 20 | 020_Nex_BRCA_TCGA-BH-A0DD-11A_e9fe9b97-f7c7-40dc-ae31-17bb15c9fd8b | 0.8677 | 0.79 | 0.9459 | 0.625 | 0.8714 |
|    | 020_Ntr_BRCA_TCGA-BH-A0DD-11A_5482cdd0-3698-455b-97c1-b10c69d67ae9 |        |      |        |       |        |
|    | 020_Tex_BRCA_TCGA-BH-A0DD-01A_99ca9706-f2bf-430b-9b23-e0947c0f8593 |        |      |        |       |        |
|    | 020_Ttr_BRCA_TCGA-BH-A0DD-01A_90cbc532-1ca8-46d6-977c-72b6d01e9c34 |        |      |        |       |        |
| 21 | 021_Nex_BRCA_TCGA-BH-A0H5-11A_adfb1a86-fbb1-4b71-9c04-f99399f20d70 | 0.4399 | NaN  | NaN    | 0.475 | 0.1632 |
|    | 021_Ntr_BRCA_TCGA-BH-A0H5-11A_896d76a1-bae8-495a-9e12-e82e16bd8b16 |        |      |        |       |        |
|    | 021_Tex_BRCA_TCGA-BH-A0H5-01A_6cc3c90e-c77c-4609-ada5-9b78c659dc34 |        |      |        |       |        |
|    | 021_Ttr_BRCA_TCGA-BH-A0H5-01A_778c9326-998d-4081-b148-0eede2b94e29 |        |      |        |       |        |
| 22 | 022_Nex_BRCA_TCGA-A7-A0DB-11A_91081819-79c8-4de6-bfdb-742df760c08b | 0.7341 | 0.44 | NaN    | 0.85  | 0.6494 |
|    | 022_Ntr_BRCA_TCGA-A7-A0DB-11A_a8ed2ec3-0285-4028-9698-710a148ce11b |        |      |        |       |        |
|    | 022_Tex_BRCA_TCGA-A7-A0DB-01A_37a9daca-9d53-4ec4-8de2-dc2c140a5d8f |        |      |        |       |        |
|    | 022_Ttr_BRCA_TCGA-A7-A0DB-01A_1f62e969-d05d-4a4d-a163-cb06e4958f71 |        |      |        |       |        |
| 23 | 023_Nex_BRCA_TCGA-BH-A1FN-11A_e1c0d95f-949c-4cec-9cf8-f91c3b90b8d9 | 0.8367 | 0.7  | 0.8509 | 0.75  | 0.8313 |
|    | 023_Ntr_BRCA_TCGA-BH-A1FN-11A_d5e5f3c9-4129-4c92-87f3-6f86577a7584 |        |      |        |       |        |
|    | 023_Tex_BRCA_TCGA-BH-A1FN-01A_8d715491-6943-4d58-92f6-88cce7b463e2 |        |      |        |       |        |
|    | 023_Ttr_BRCA_TCGA-BH-A1FN-01A_8e7dc738-8a8f-45b2-bd82-4125a07d7373 |        |      |        |       |        |
| 24 | 024_Nex_BRCA_TCGA-BH-A0AZ-11A_9bbae9a0-9f12-48cf-9aa7-d070c6627ea5 | 0.6505 | 0.53 | 0.8696 | 0.7   | 0.6655 |
|    | 024_Ntr_BRCA_TCGA-BH-A0AZ-11A_693bf8e4-b266-4b58-b812-f579179efb65 |        |      |        |       |        |
|    | 024_Tex_BRCA_TCGA-BH-A0AZ-01A_664528b7-b511-4627-8464-0702263434c5 |        |      |        |       |        |
|    | 024_Ttr_BRCA_TCGA-BH-A0AZ-01A_07f377f4-0bd1-4647-bf06-ff6ed553c44a |        |      |        |       |        |
| 25 | 025_Nex_BRCA_TCGA-BH-A0HA-11A_c61bb1ab-688f-4d58-8388-60ae77c28840 | 0.6418 | 0.74 | 0.9258 | 0.725 | 0.7386 |
|    | 025_Ntr_BRCA_TCGA-BH-A0HA-11A_09e07a68-a443-c16-a0de-78cd8aea59c0  |        |      |        |       |        |
|    | 025_Tex_BRCA_TCGA-BH-A0HA-01A_2c144eba-6490-4d64-9446-085d6edc8308 |        |      |        |       |        |
|    | 025_Ttr_BRCA_TCGA-BH-A0HA-01A_6d483def-2d91-4afc-991a-4a29804a6f3a |        |      |        |       |        |
| 26 | 026_Nex_BRCA_TCGA-A7-A0CE-11A_eee8d4d0-d524-47f5-b076-6ad6216de1a3 | 0.9035 | 0.73 | NaN    | 0.835 | 0.8551 |
|    | 026_Ntr_BRCA_TCGA-A7-A0CE-11A_548cad87-ec95-47e2-890e-7c8284ea5b88 |        |      |        |       |        |
|    | 026_Tex_BRCA_TCGA-A7-A0CE-01A_4288da4e-7e77-434b-a092-9450b0cb7833 |        |      |        |       |        |
|    | 026_Ttr_BRCA_TCGA-A7-A0CE-01A_14201682-0c8d-49c7-a5e1-702661a07b69 |        |      |        |       |        |
| 27 | 027_Nex_BRCA_TCGA-BH-A0DK-11A_3f4400a1-84ab-4198-b9a1-67b2ffc5ef36 | 0.5384 | 0.53 | 0.7316 | 0.7   | 0.6837 |
|    | 027_Ntr_BRCA_TCGA-BH-A0DK-11A_ac67044f-62c9-405f-bfc1-f0b8f1bc66d3 |        |      |        |       |        |
|    | 027_Tex_BRCA_TCGA-BH-A0DK-01A_e3e2053a-3ca2-4527-9b94-209def68dcc3 |        |      |        |       |        |
|    | 027_Ttr_BRCA_TCGA-BH-A0DK-01A_a3df35ec-a8d2-44ad-8ba6-eaba504261e0 |        |      |        |       |        |
| 28 | 028_Nex_BRCA_TCGA-BH-A0E1-11A_f6fed4ed-a853-40aa-bf7b-e627efd402d6 | 0.8676 | 0.75 | 0.9742 | 0.825 | 0.8524 |
|    | 028_Ntr_BRCA_TCGA-BH-A0E1-11A_52441de4-e26b-42b3-b061-94907c049501 |        |      |        |       |        |
|    | 028_Tex_BRCA_TCGA-BH-A0E1-01A_3c7e6a59-08b8-4903-932a-99946a96b746 |        |      |        |       |        |
|    | 028_Ttr_BRCA_TCGA-BH-A0E1-01A_f412f8d8-9e35-41d9-b44a-131186cb4bb0 |        |      |        |       |        |
| 29 | 029_Nex_BRCA_TCGA-BH-A0DG-11A_c99b1fb3-17e3-4472-86ee-7fda358a92c2 | 0.6358 | 0.42 | 0.7804 | 0.775 | 0.5386 |
|    | 029_Ntr_BRCA_TCGA-BH-A0DG-11A_bfdaf242-1e97-450d-9983-2cbb4e99305d |        |      |        |       |        |
|    | 029_Tex_BRCA_TCGA-BH-A0DG-01A_721e2f71-60ae-4d63-9f05-113bce56c672 |        |      |        |       |        |
|    | 029_Ttr_BRCA_TCGA-BH-A0DG-01A_865afd6b-84a7-4dde-aa23-0b925c0b9d50 |        |      |        |       |        |
| 30 | 030_Nex_BRCA_TCGA-AC-A2FB-11A_552279ea-d7b1-496d-8170-ca30f5b62b5a | 0.5372 | 0.23 | 0.5493 | 0.7   | 0.4436 |
|    | 030_Ntr_BRCA_TCGA-AC-A2FB-11A_56cd7da0-2c47-4986-91ce-07db2bb87369 |        |      |        |       |        |
|    | 030_Tex_BRCA_TCGA-AC-A2FB-01A_de000c35-8bf4-470a-9656-1b5da0deeb6e |        |      |        |       |        |
|    | 030_Ttr_BRCA_TCGA-AC-A2FB-01A_35aa5078-e07f-4a0f-84c1-01a0e566e97c |        |      |        |       |        |
| 31 | 031_Nex_BRCA_TCGA-BH-A0H7-11A_abfca562-d328-40d2-83bb-e584123b0f28 | 0.7939 | 0.63 | 0.9561 | 0.725 | 0.7534 |
|    | 031_Ntr_BRCA_TCGA-BH-A0H7-11A_d969d9b2-9d8b-4594-95d4-87e6ce1236fc |        |      |        |       |        |
|    | 031_Tex_BRCA_TCGA-BH-A0H7-01A_e8daad78-39fc-4835-b1c4-8807653d9c9a |        |      |        |       |        |

|    |                                                                                                                                                                                                                                                                                       |        |      |        |       |        |  |  |
|----|---------------------------------------------------------------------------------------------------------------------------------------------------------------------------------------------------------------------------------------------------------------------------------------|--------|------|--------|-------|--------|--|--|
|    | 031_Ttr_BRCA_TCGA-BH-A0H7-01A_0d37f87a-760a-472a-acba-bbc255422fbc                                                                                                                                                                                                                    |        |      |        |       |        |  |  |
| 32 | 032_Nex_BRCA_TCGA-BH-A1EU-11A_38e87966-9605-4454-a4d1-28f96b7689f7<br>032_Ntr_BRCA_TCGA-BH-A1EU-11A_3b00c121-17f2-461e-8873-08d15e9ec9f4<br>032_Tex_BRCA_TCGA-BH-A1EU-01A_4bccbb0f-2641-44df-b89a-42f020b4c08f<br>032_Ttr_BRCA_TCGA-BH-A1EU-01A_86e3dba1-48fb-44cc-b046-8bc35963ce99  | 0.5387 | 0.33 | 0.6869 | 0.65  | 0.4299 |  |  |
| 33 | 033_Nex_BRCA_TCGA-BH-A0DP-11A_27543260-52ac-444b-8214-e62dca2cc8fe<br>033_Ntr_BRCA_TCGA-BH-A0DP-11A_30f4e5d8-a13d-4ef2-88e0-a01e07c2e142<br>033_Tex_BRCA_TCGA-BH-A0DP-01A_0326975a-2e56-404a-8776-92c5c5678853<br>033_Ttr_BRCA_TCGA-BH-A0DP-01A_7ff8a7a0-5235-4de0-bb9f-b811230b5bda  | 0.7037 | 0.42 | 0.8565 | 0.7   | 0.655  |  |  |
| 34 | 034_Nex_BRCA_TCGA-BH-A18N-11A_6c8aae77-5f43-41ec-a139-81f3ba02f6ea<br>034_Ntr_BRCA_TCGA-BH-A18N-11A_0738f1b2-aa50-4921-82e1-d3614b40f98d<br>034_Tex_BRCA_TCGA-BH-A18N-01A_b6f89799-9070-4fbc-b10c-53cbe515eccc<br>034_Ttr_BRCA_TCGA-BH-A18N-01A_4b7b8eb8-d939-411c-be5e-cf41a5521963  | 0.8685 | 0.76 | NaN    | 0.9   | 0.832  |  |  |
| 35 | 035_Nex_BRCA_TCGA-BH-A0BC-11A_6359db46-f8dd-4dc8-a3a9-8725d8f6958a<br>035_Ntr_BRCA_TCGA-BH-A0BC-11A_2cb50d4a-d6df-4b64-acfb-7a7db5ddd1de<br>035_Tex_BRCA_TCGA-BH-A0BC-01A_73b9208d-336c-4990-a27d-0164a77dd165<br>035_Ttr_BRCA_TCGA-BH-A0BC-01A_92e26b53-f540-428a-a3c5-848a36b31171  | 0.6221 | 0.6  | 0.8221 | 0.8   | 0.7727 |  |  |
| 36 | 036_Nex_BRCA_TCGA-BH-A0BZ-11A_2b4e3d99-07cd-4b06-ad97-82a19ac0eb5d<br>036_Ntr_BRCA_TCGA-BH-A0BZ-11A_3aa16a4b-4e35-4530-84fb-0cb20429b08<br>036_Tex_BRCA_TCGA-BH-A0BZ-01A_74414845-839f-4885-b13d-3f2e17781f84<br>036_Ttr_BRCA_TCGA-BH-A0BZ-01A_efefcc2f-72e9-4634-b943-d26083e1a312   | 0.5788 | 0.37 | 0.7363 | 0.6   | 0.5138 |  |  |
| 37 | 037_Nex_BRCA_TCGA-BH-A0DL-11A_2d495f9c-4ffa-4169-b583-6786612e9606<br>037_Ntr_BRCA_TCGA-BH-A0DL-11A_bd8b100a-8391-4046-847f-c3fdd3830eeb<br>037_Tex_BRCA_TCGA-BH-A0DL-01A_dfd355e4-478a-47cb-9aab-8ce22b6f936c<br>037_Ttr_BRCA_TCGA-BH-A0DL-01A_11d77ef2-b3f9-4af9-8490-71f9a8c599e0  | 0.6944 | 0.53 | NaN    | 0.65  | 0.6655 |  |  |
| 38 | 038_Nex_BRCA_TCGA-BH-A0BT-11A_32430467-5215-4738-86a3-5bbe11fbaa86<br>038_Ntr_BRCA_TCGA-BH-A0BT-11A_cbef4196-5f3b-40d9-b26f-5b2bb82fbc9b<br>038_Tex_BRCA_TCGA-BH-A0BT-01A_e78b9962-7bc2-4238-806a-5933ac07de99<br>038_Ttr_BRCA_TCGA-BH-A0BT-01A_aae75165-efa0-46b3-8a8d-82dc7d82aeed  | 0.8096 | 0.67 | 0.9054 | 0.75  | 0.7751 |  |  |
| 39 | 039_Nex_BRCA_TCGA-BH-A18Q-11A_b58d4f69-a4ea-489b-9d25-e5cfdc465adb<br>039_Ntr_BRCA_TCGA-BH-A18Q-11A_76575097-374b-4fb2-8054-2a31b4204165<br>039_Tex_BRCA_TCGA-BH-A18Q-01A_1f2c90ef-a05d-494c-9232-e705691f46b9<br>039_Ttr_BRCA_TCGA-BH-A18Q-01A_f0173e28-7fe4-411f-a187-57fd94a7935a  | 0.8117 | 0.73 | NaN    | 0.9   | 0.836  |  |  |
| 40 | 040_Nex_BRCA_TCGA-E2-A1LB-11A_e2d7a695-b0bf-4432-8f98-1843bb49efba<br>040_Ntr_BRCA_TCGA-E2-A1LB-11A_6eb518ab-f174-45ae-8d65-74086ecb1125<br>040_Tex_BRCA_TCGA-E2-A1LB-01A_3ddbc444-ee1b-43be-bab5-b0f67d5eb339<br>040_Ttr_BRCA_TCGA-E2-A1LB-01A_d7d566a0-b6d0-4a4f-8211-9309b27b0ade  | 0.8415 | 0.68 | 0.8192 | 0.9   | 0.815  |  |  |
| 41 | 041_Nex_BRCA_TCGA-BH-A0DH-11A_a7a7e0f6-100f-4145-9599-693e6c14e903<br>041_Ntr_BRCA_TCGA-BH-A0DH-11A_5a0374e5-ccc9-4952-9df0-4ff125196478<br>041_Tex_BRCA_TCGA-BH-A0DH-01A_eb680f8c-4ba1-45ef-8b94-e58b68922f2f<br>041_Ttr_BRCA_TCGA-BH-A0DH-01A_71a3c27c-0982-4da6-b260-cf16a4868a19  | 0.8317 | 0.76 | 0.8955 | 0.85  | 0.8597 |  |  |
| 42 | 042_Nex_BRCA_TCGA-BH-A0B7-11A_d9aca915-ea30-4939-af59-edaeef8872396<br>042_Ntr_BRCA_TCGA-BH-A0B7-11A_8db8b247-05b8-46ca-8791-ecf846da2c7f<br>042_Tex_BRCA_TCGA-BH-A0B7-01A_e3b9eb8a-93f3-4668-a54b-fa8b15be5667<br>042_Ttr_BRCA_TCGA-BH-A0B7-01A_0fdae4ee-ca68-4ba4-ba58-76058409b02f | 0.6207 | 0.2  | NaN    | 0.575 | 0.4954 |  |  |
| 43 | 043_Nex_BRCA_TCGA-E2-A15I-11A_36024763-f828-4496-8fdc-46d5c3de569b<br>043_Ntr_BRCA_TCGA-E2-A15I-11A_ffa9ace8-9253-4775-9ad2-2a8a50c0f9c9<br>043_Tex_BRCA_TCGA-E2-A15I-01A_8c627466-eb99-4a7e-87e6-314ae8ed32a1<br>043_Ttr_BRCA_TCGA-E2-A15I-01A_3a4e3785-fb2e-4ffc-9644-91c78a9a9ebe  | 0.7689 | 0.62 | 0.768  | 0.8   | 0.7565 |  |  |
| 44 | 044_Nex_BRCA_TCGA-BH-A0DV-11A_79a92eab-c87c-4209-819e-193d653c0dff6<br>044_Ntr_BRCA_TCGA-BH-A0DV-11A_e87e7e3e-9059-47cf-9f45-8959250b037f<br>044_Tex_BRCA_TCGA-BH-A0DV-01A_105290eb-b626-4318-9b8a-42f477e2cec6<br>044_Ttr_BRCA_TCGA-BH-A0DV-01A_7bad3f4c-6065-4245-8119-c25596f38829 | 0.6021 | 0.31 | 0.7631 | 0.7   | 0.4856 |  |  |
| 45 | 045_Nex_BRCA_TCGA-BH-A0DZ-11A_aebf04d4-4a1b-4a50-b5f1-0f9e2c273121<br>045_Ntr_BRCA_TCGA-BH-A0DZ-11A_80b4d43d-9e7d-4ab8-b05a-0eb51faa9d12<br>045_Tex_BRCA_TCGA-BH-A0DZ-01A_4e7d62f5-4be9-4b9c-9b7c-aec4567dded2<br>045_Ttr_BRCA_TCGA-BH-A0DZ-01A_8b1982a0-315c-47e1-8de0-a1e5ec51dd74  | 0.6572 | 0.65 | NaN    | 0.885 | 0.7792 |  |  |
| 46 | 046_Nex_BRCA_TCGA-BH-A18R-11A_b32b2067-a79e-42c5-ae78-135c845253fe<br>046_Ntr_BRCA_TCGA-BH-A18R-11A_f82099ae-9d74-44d8-ba5b-cd10eeb09807<br>046_Tex_BRCA_TCGA-BH-A18R-01A_c518bc34-50dc-4265-824f-a954e4d19f0b<br>046_Ttr_BRCA_TCGA-BH-A18R-01A_fc65ff2e-9808-4c1e-a16b-8285fd0d27df  | 0.8685 | 0.53 | NaN    | 0.85  | 0.7466 |  |  |
| 47 | 047_Nex_BRCA_TCGA-E2-A15K-11A_6299f114-932a-42c0-8cab-bebb12c996fc                                                                                                                                                                                                                    | 0.7425 | 0.7  | 0.724  | 0.9   | NaN    |  |  |



|    |                                                                    |        |      |        |      |        |
|----|--------------------------------------------------------------------|--------|------|--------|------|--------|
| 63 | 063_Nex_BRCA_TCGA-BH-A18V-11A_353e7fa1-08c5-400a-b352-b5325e40d66c | 0.6941 | 0.56 | NaN    | 0.75 | NaN    |
|    | 063_Ntr_BRCA_TCGA-BH-A18V-11A_e3c5cba8-e3ba-4e0b-929b-280708e0a855 |        |      |        |      |        |
|    | 063_Tex_BRCA_TCGA-BH-A18V-01A_abcf2a8e-6f4c-4668-9ef9-41d95d16e8e6 |        |      |        |      |        |
|    | 063_Ttr_BRCA_TCGA-BH-A18V-01A_286394db-7d5e-4de2-b386-581352164350 |        |      |        |      |        |
| 64 | 064_Nex_BRCA_TCGA-BH-A0DT-11A_6dde640a-1d79-4e7d-9491-c500b8183d9a | 0.7462 | 0.42 | NaN    | 0.55 | 0.6659 |
|    | 064_Ntr_BRCA_TCGA-BH-A0DT-11A_71aa4cd6-75ea-4e10-b16c-ea9adbf31a98 |        |      |        |      |        |
|    | 064_Tex_BRCA_TCGA-BH-A0DT-01A_9d93c6fb-336a-4cb4-9f33-8557456753b1 |        |      |        |      |        |
|    | 064_Ttr_BRCA_TCGA-BH-A0DT-01A_61ad7408-dacd-4913-a479-c456e8b03191 |        |      |        |      |        |
| 65 | 065_Nex_BRCA_TCGA-GI-A2C9-11A_454dbdba-da53-4e99-9670-dff1e5bbb77c | 0.8062 | 0.51 | 0.8386 | 0.8  | 0.6969 |
|    | 065_Ntr_BRCA_TCGA-GI-A2C9-11A_d8aa0349-d74e-4891-8398-6476eb1935f0 |        |      |        |      |        |
|    | 065_Tex_BRCA_TCGA-GI-A2C9-01A_2f2b0909-488b-4fa3-8251-2ef6e7d5869e |        |      |        |      |        |
|    | 065_Ttr_BRCA_TCGA-GI-A2C9-01A_01ea694e-989b-4a35-9397-5e508656d1d8 |        |      |        |      |        |
| 66 | 066_Nex_BRCA_TCGA-BH-A209-11A_c580c610-832d-45be-9963-06bb918ede73 | 0.5979 | 0.24 | 0.6243 | 0.6  | 0.4645 |
|    | 066_Ntr_BRCA_TCGA-BH-A209-11A_b8b48554-ca2f-466d-85b0-9d473cca8ca7 |        |      |        |      |        |
|    | 066_Tex_BRCA_TCGA-BH-A209-01A_7b85ca36-2fe9-4156-99eb-f79463dbc572 |        |      |        |      |        |
|    | 066_Ttr_BRCA_TCGA-BH-A209-01A_b2cf947a-5ed1-4e24-8752-bf2a6eca895a |        |      |        |      |        |
| 67 | 067_Nex_BRCA_TCGA-BH-A1EV-11A_f4d30842-7873-46d3-8f25-ae7d05909175 | 0.8435 | 0.61 | 0.9517 | 0.8  | 0.817  |
|    | 067_Ntr_BRCA_TCGA-BH-A1EV-11A_73e296db-9eec-4060-97c9-80a98dbb9fb6 |        |      |        |      |        |
|    | 067_Tex_BRCA_TCGA-BH-A1EV-01A_fb502696-cb13-487a-a70a-6ceefcf20ca0 |        |      |        |      |        |
|    | 067_Ttr_BRCA_TCGA-BH-A1EV-01A_93ab3adf-7ab9-455e-9007-9f51443352fe |        |      |        |      |        |
| 68 | 068_Nex_BRCA_TCGA-GI-A2C8-11A_836e4482-11c7-4422-a2e5-cac9b846ea71 | 0.601  | 0.48 | 0.7846 | 0.85 | 0.6998 |
|    | 068_Ntr_BRCA_TCGA-GI-A2C8-11A_580d9a3d-e198-4e7b-aa1f-419d868bb0b5 |        |      |        |      |        |
|    | 068_Tex_BRCA_TCGA-GI-A2C8-01A_146c0ba4-6761-446c-be7c-7e56c0ffa37b |        |      |        |      |        |
|    | 068_Ttr_BRCA_TCGA-GI-A2C8-01A_c0ee6e25-02b9-4b2f-9f23-fd61eedf9945 |        |      |        |      |        |
| 69 | 069_Nex_BRCA_TCGA-BH-A0BM-11A_92faafbd-6a76-4116-80fc-a15767aa81d0 | 0.796  | 0.61 | 0.9189 | 0.84 | 0.7886 |
|    | 069_Ntr_BRCA_TCGA-BH-A0BM-11A_ae127be2-5e4c-4b7e-9cf8-3aa9e529baaa |        |      |        |      |        |
|    | 069_Tex_BRCA_TCGA-BH-A0BM-01A_c513ed81-255f-43b0-b8aa-984326201745 |        |      |        |      |        |
|    | 069_Ttr_BRCA_TCGA-BH-A0BM-01A_006b2b95-7069-4cb6-bfe8-7edb80056add |        |      |        |      |        |
| 70 | 070_Nex_BRCA_TCGA-BH-A18L-11A_7a010ccd-f780-45f0-98da-cc738e87b6d3 | 0.927  | 0.81 | NaN    | 0.8  | 0.9113 |
|    | 070_Ntr_BRCA_TCGA-BH-A18L-11A_ef4660c0-c177-4d46-90f9-56e3dc47b59e |        |      |        |      |        |
|    | 070_Tex_BRCA_TCGA-BH-A18L-01A_0d4aca9c-c11e-4f78-a250-08d45ce4828e |        |      |        |      |        |
|    | 070_Ttr_BRCA_TCGA-BH-A18L-01A_laf43803-7afa-4d2b-aa78-2dec84c1e702 |        |      |        |      |        |
| 71 | 071_Nex_BRCA_TCGA-A7-A13F-11A_471d1e10-7c79-44f9-a373-bd3e510b6155 | 0.8478 | 0.65 | 0.9236 | 0.7  | 0.7915 |
|    | 071_Ntr_BRCA_TCGA-A7-A13F-11A_4e4cd9e5-27bb-4ea7-9328-0b267373ec1c |        |      |        |      |        |
|    | 071_Tex_BRCA_TCGA-A7-A13F-01A_d8fad6b2-66b8-4d6f-b018-653998675921 |        |      |        |      |        |
|    | 071_Ttr_BRCA_TCGA-A7-A13F-01A_75898a6d-75e4-4dca-a7ed-c11056e0c9c4 |        |      |        |      |        |
| 72 | 072_Nex_BRCA_TCGA-E2-A15M-11A_b2138cda-519f-4691-bf1c-0f863b55d888 | 0.4911 | 0.28 | NaN    | 0.8  | 0.4285 |
|    | 072_Ntr_BRCA_TCGA-E2-A15M-11A_bf873756-8ee8-49bd-b2ca-17223c7ef962 |        |      |        |      |        |
|    | 072_Tex_BRCA_TCGA-E2-A15M-01A_lccf392d-7959-4bb9-8ca8-4298409f4951 |        |      |        |      |        |
|    | 072_Ttr_BRCA_TCGA-E2-A15M-01A_b2569032-6147-4a1c-973f-d5985127e9f4 |        |      |        |      |        |
